# Supplementary material for: Meiotic interstrand DNA damage escapes paternal repair and causes chromosomal aberrations in the zygote by maternal misrepair
Source: PubMed Central journal article supplement — Sci Rep. 2015 Jan 8;5:7689. doi: 10.1038/srep07689 (PMC4286742; doi:10.1038/srep07689), 2015-01-08
Supplement: srep07689-s1.pdf [file srep07689-s1.pdf]

**MEIOTIC INTERSTRAND DNA DAMAGE ESCAPES PATERNAL REPAIR AND  
CAUSES CHROMOSOMAL ABERRATIONS IN THE ZYGOTE BY MATERNAL  
MISREPAIR**

Francesco Marchetti<sup>1,2,3</sup>, Jack Bishop<sup>4</sup>, John Gingerich<sup>1</sup>, Andrew J Wyrobek<sup>2,3</sup>

<sup>1</sup>Environmental Health Science Research Bureau, Health Canada, Ottawa, Ontario, Canada, K1A 0K9; <sup>2</sup>Life Sciences Division, Lawrence Berkeley National Laboratory, Berkeley, California, USA 94720; <sup>3</sup>Biosciences Department, Lawrence Livermore National Laboratory, Livermore, California 94550, USA; <sup>4</sup>National Toxicology Program, National Institute of Environmental Health Sciences, Research Triangle Park, North Carolina 27709, USA

Send correspondence to: Dr. Francesco Marchetti  
Environmental Health Science Research Bureau  
Health Canada  
50 Colombine Driveway, 0803A  
Ottawa, Ontario, K1A 0K9, Canada  
Tel: 613 957-3137  
Email: [Francesco.marchetti@hc-sc.gc.ca](mailto:Francesco.marchetti@hc-sc.gc.ca)

Table S1: Comparison of numbers and types of chromosomal structural aberrations in mouse first-cleavage (1-CI) zygotes after male exposure to 7.5 mg/kg MLP detected by PAINT/DAPI analysis.

| Days<br>p.t. <sup>a</sup> | 1-CI<br>zygotes | DAPI analysis |            |           |       | Cell<br>eq <sup>b</sup> | PAINT analysis |            |           |                |            |       |
|---------------------------|-----------------|---------------|------------|-----------|-------|-------------------------|----------------|------------|-----------|----------------|------------|-------|
|                           |                 | Total         | Dicentrics | Fragments | Other |                         | Total          | Dicentrics | Fragments | Translocations | Insertions | Other |
| Controls                  | 282             | 0.014         | 0.003      | 0.010     | 0     | 166                     | 0.018          | 0.006      | 0.012     | 0              | 0          | 0     |
| 3                         | 139             | 0.245         | 0.086      | 0.094     | 0.065 | 82                      | 0.219          | 0.073      | 0.024     | 0.098          | 0          | 0.024 |
| 7                         | 230             | 0.430         | 0.117      | 0.230     | 0.083 | 135                     | 0.488          | 0.081      | 0.163     | 0.207          | 0.022      | 0.015 |
| 23                        | 293             | 1.689         | 0.464      | 0.843     | 0.382 | 170                     | 1.929          | 0.388      | 0.482     | 0.929          | 0.071      | 0.059 |
| 37                        | 216             | 0.093         | 0.028      | 0.046     | 0.019 | 127                     | 0.064          | 0.024      | 0.024     | 0.016          | 0          | 0     |
| 49                        | 167             | 0.012         | 0          | 0.006     | 0.006 | 93                      | 0              | 0          | 0         | 0              | 0          | 0     |

<sup>a</sup>Post treatment.

<sup>b</sup>Cell-equivalents.

**SUPPLEMENTARY FIGURE LEGENDS**

**Figure S1:** Linear regression analyses of the relationship between the frequencies of zygotes with chromosomal aberrations and reproductive outcomes. Data from the present work with MLP are indicated with black triangles; literature data after paternal exposure to 13 mutagens are indicated with white triangles. **(A)** Correlation between unstable aberrations in zygotes and embryonic lethality as measured in standard dominant lethal tests. **(B)** Correlation between reciprocal translocations in zygotes and translocation carriers after birth as measured in standard heritable translocation tests. [Adapted from Marchetti et al. 2007].

**Figure S2:** Comparison of the percentages of MI and MII spermatocyte metaphases with chromosomal aberrations, sperm with duplications and deletions by the CT8 assay and zygotes with chromosomal aberrations by PAINT/DAPI analysis after paternal exposure to etoposide (and mating 25 days after treatment) and melphalan (and mating 23 days after treatment). Bars represent the standard errors. Data for etoposide from Marchetti et al., 2001; 2006.

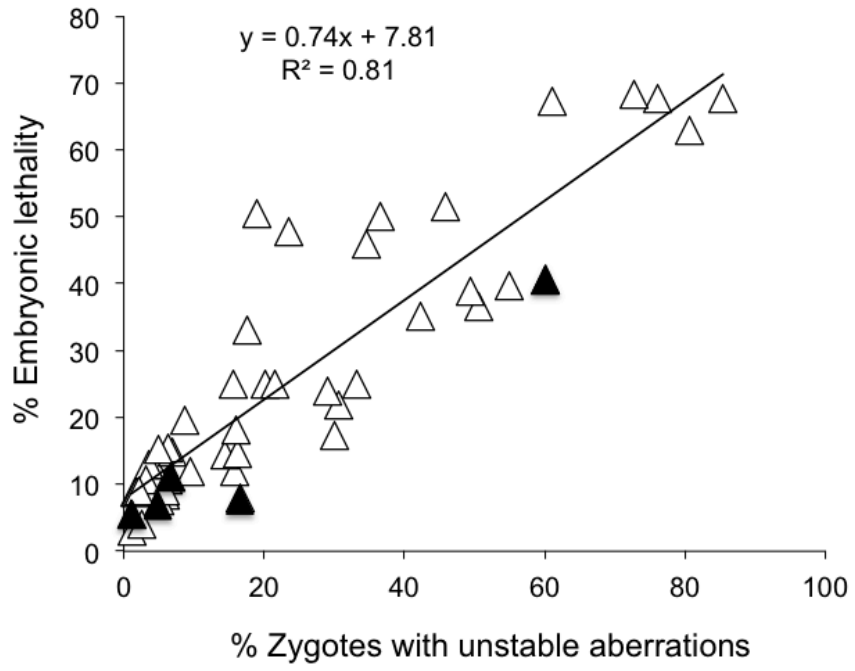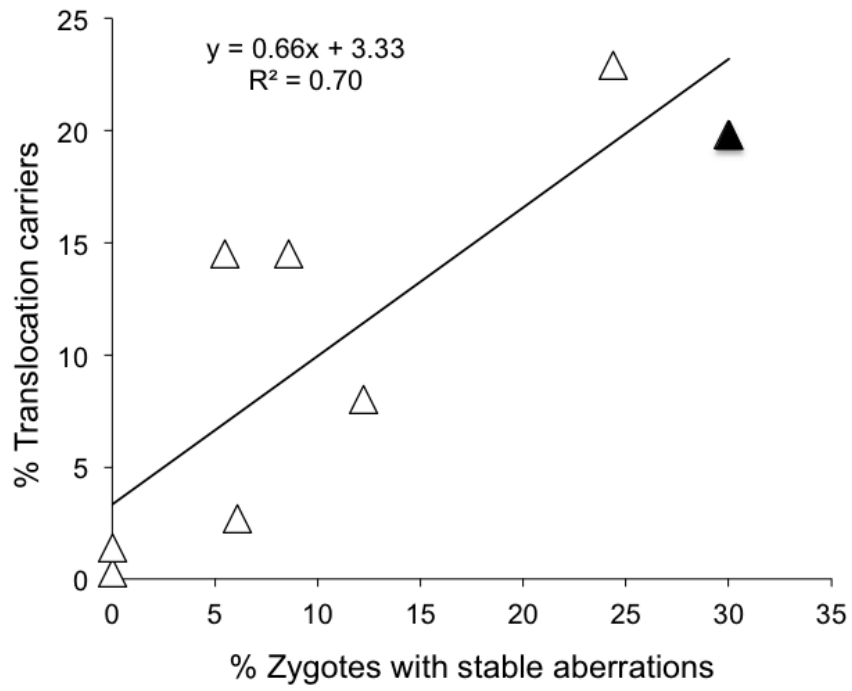

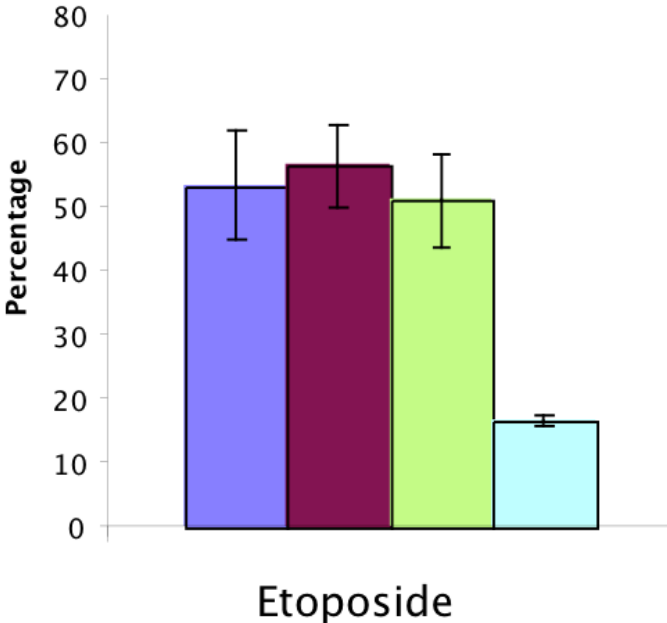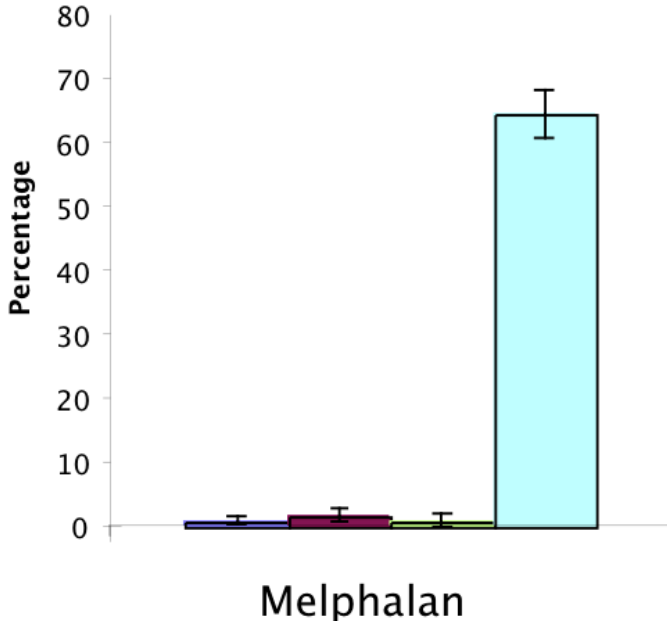

MI MII CT8 PAINT/DAPI
